# Supplementary material
Source: publisher figshare collection journal article supplement (https://acs.figshare.com/ndownloader/files/3984505)
Supplement: Supplementary file 1 [file 3984505]

## **Supporting Information**

### **A Kinetic Isotope Effect and Isotope Exchange Study of the Non-enzymatic and Butyrylcholinesterase-Catalyzed Hydrolysis of Formylthiocholine.**

Lori I. Robins, Kristen M. Meisenheimer, Emily J. Fogle, Cory A. Chaplan, Richard L. Redman, Joseph T. Vacca, Michelle R. Tellier, Brittney R. Collins, Dorothea H. Duong, Kathrin Schulz, and John F. Marlier\*

| <b>Page</b> | <b>Information</b>                                                                                                                                                                                                                          |
|-------------|---------------------------------------------------------------------------------------------------------------------------------------------------------------------------------------------------------------------------------------------|
| 2           | (Scheme S1) The Synthetic Scheme for Production of FTC<br>(Figure S1a) $^1\text{H}$ -NMR of FTC.                                                                                                                                            |
| 3           | (Figure S1b) $^{13}\text{C}$ -NMR H-FTC.                                                                                                                                                                                                    |
| 4           | (Figure S1c) $^2\text{H}$ -NMR spectra for D-FTC.<br>(Figure S1d) $^1\text{H}$ -NMR of FTC of 1- $^{13}\text{C}$ -FTC.                                                                                                                      |
| 5           | (Figure S2a) Sample Stacked Plot of the $^1\text{H}$ -NMR spectra for the Solvent KIEs on the Hydrolysis of H-FTC in 200 mM HCl/H <sub>2</sub> O.                                                                                           |
| 6           | (Figure S2b) Sample Stacked Plots of the $^1\text{H}$ -NMR spectra for the Solvent KIEs on the Hydrolysis of H-FTC in 200 mM DCl/D <sub>2</sub> O                                                                                           |
| 7           | (Figure S3a) Sample Stacked Plots of the $^1\text{H}$ -NMR spectra used to determine the Formyl-H KIEs on the Hydrolysis of H-FTC in 50 mM HCl.                                                                                             |
| 8           | (Figure S3b) Sample Stacked Plots of the $^2\text{H}$ -NMR spectra used to determine the Formyl-H KIEs on the Hydrolysis of D-FTC in 50 mM HCl.                                                                                             |
| 9           | (Figure S4) $^{13}\text{C}$ -NMR Spectra for Positional Isotope Exchange Experiments.                                                                                                                                                       |
| 10          | (Table S1) Observed First-Order Rate Constants for H-FTC and D-FTC Hydrolysis in Acidic, Basic and Neutral Conditions<br>(Table S2) Observed First-Order Rate Constants for FTC Hydrolysis at Various pH Values at $\mu = 200$ mM and 25°C. |

**Scheme S1.** Synthetic route for FTC synthesis (see experimental section for more details).

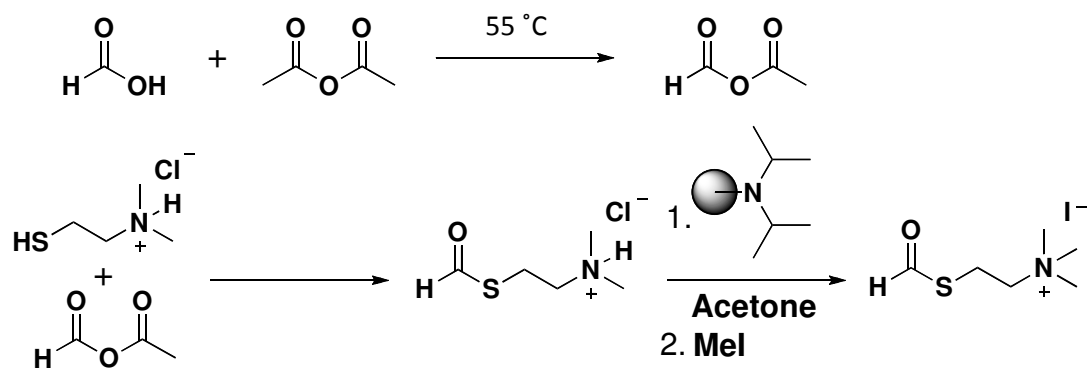

**Figure S1.** NMR spectra of FTC (a)  $^1\text{H}$ -NMR of FTC, (b)  $^{13}\text{C}$ -NMR of FTC, (c)  $^1\text{H}$ -NMR of D-FTC and (d)  $^1\text{H}$ -NMR of 1- $^{13}\text{C}$ -FTC.

(a)

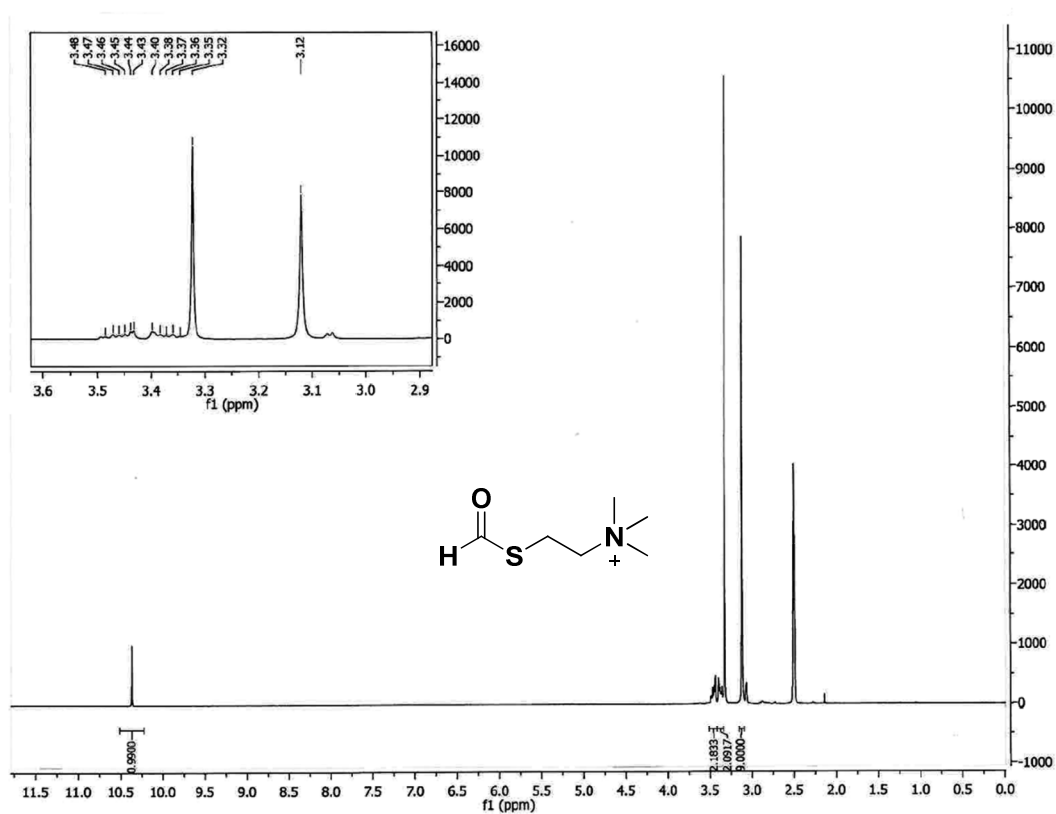

(b)

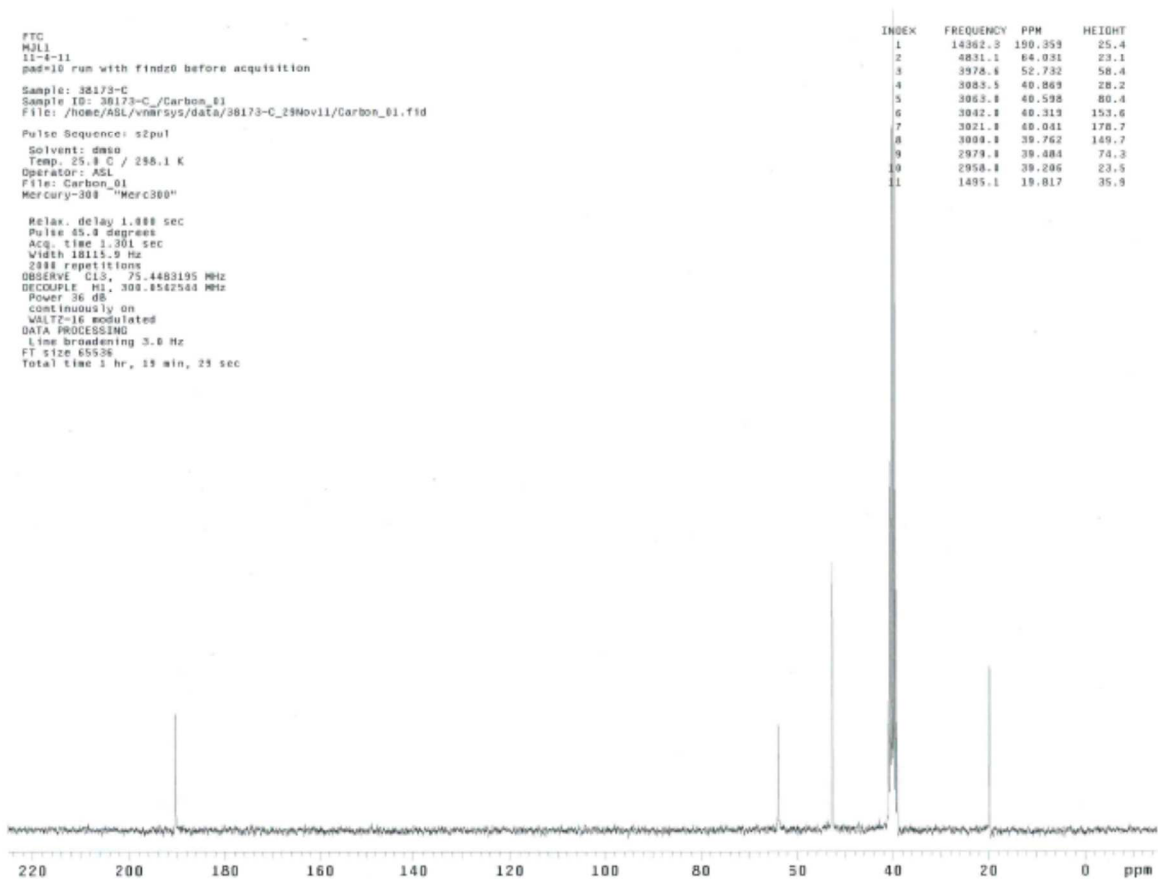

(c)

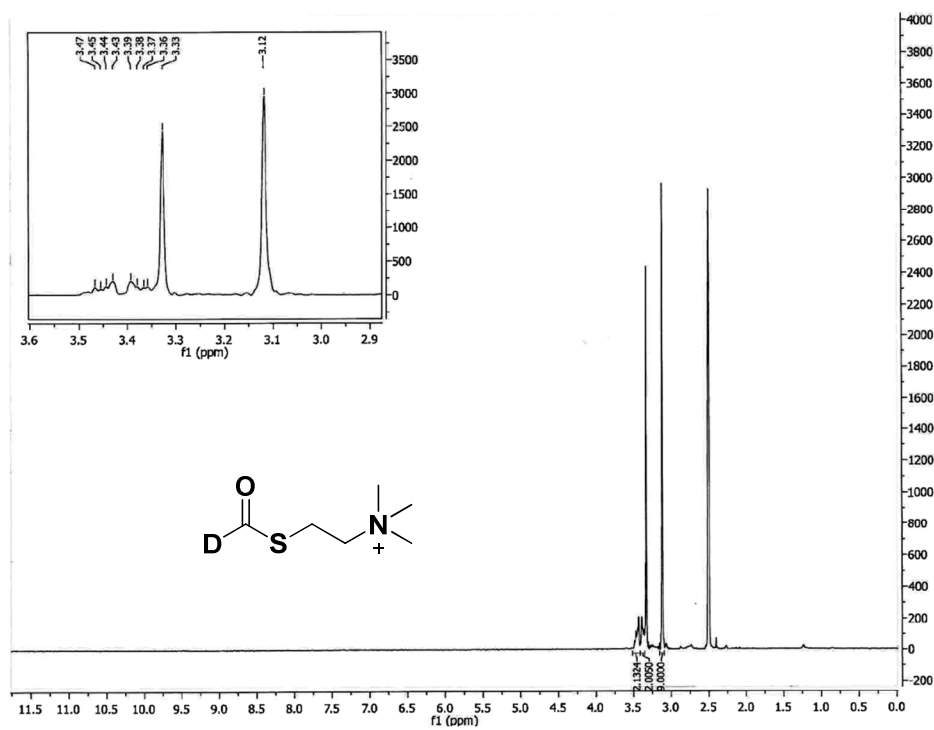

(d)

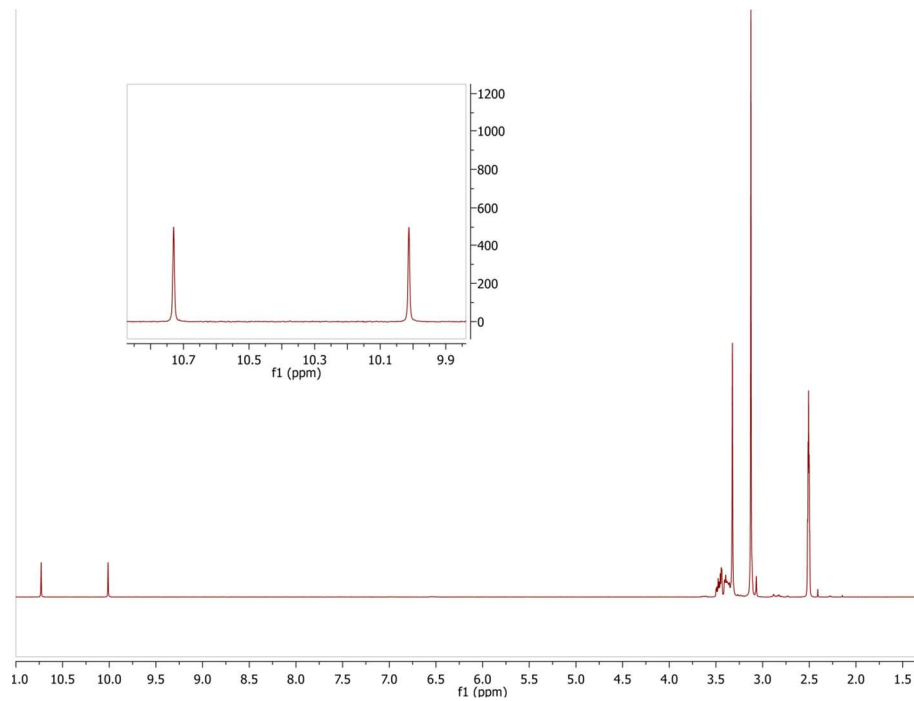

**Figure S2.** Sample Stacked Plots for the Solvent KIE on FTC Hydrolysis. (a) Hydrolysis of 50 mM FTC in 200 mM HCl. (b) Hydrolysis of 50 mM FTC 200 mM DCl.

(a)

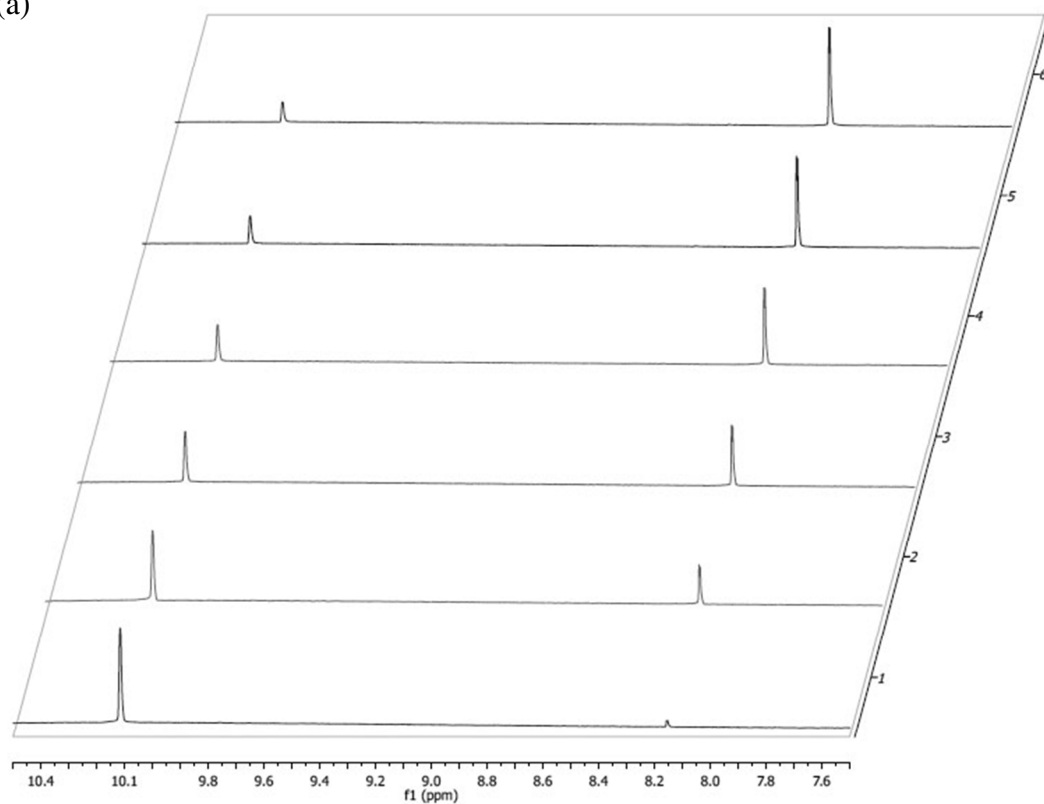

(b)

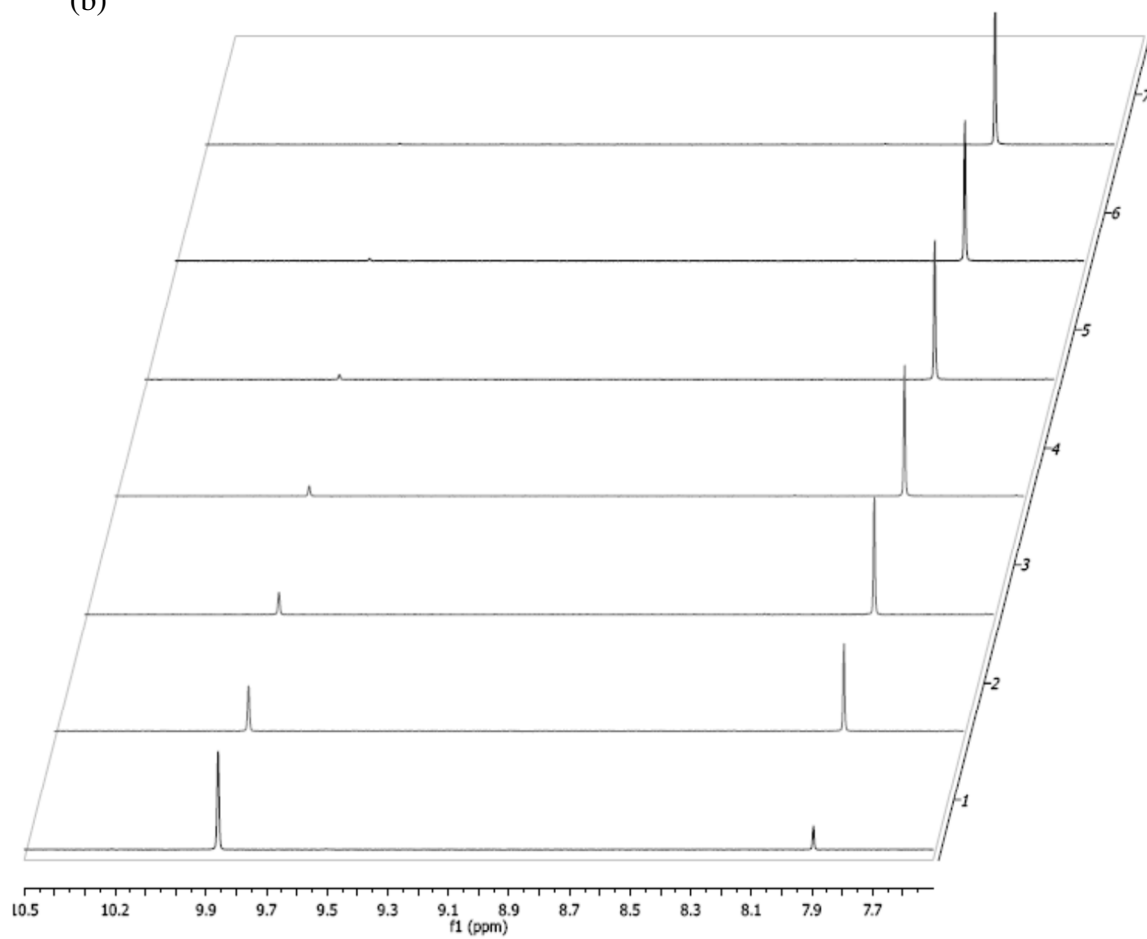

**Figure S3.** Sample Stacked Plots for the Formyl-H KIE. (a) Hydrolysis of H-FTC in 50 mM HCl/150 mM KCl. (b) Hydrolysis of D-FTC in 50 mM HCl/150 mM KCl.

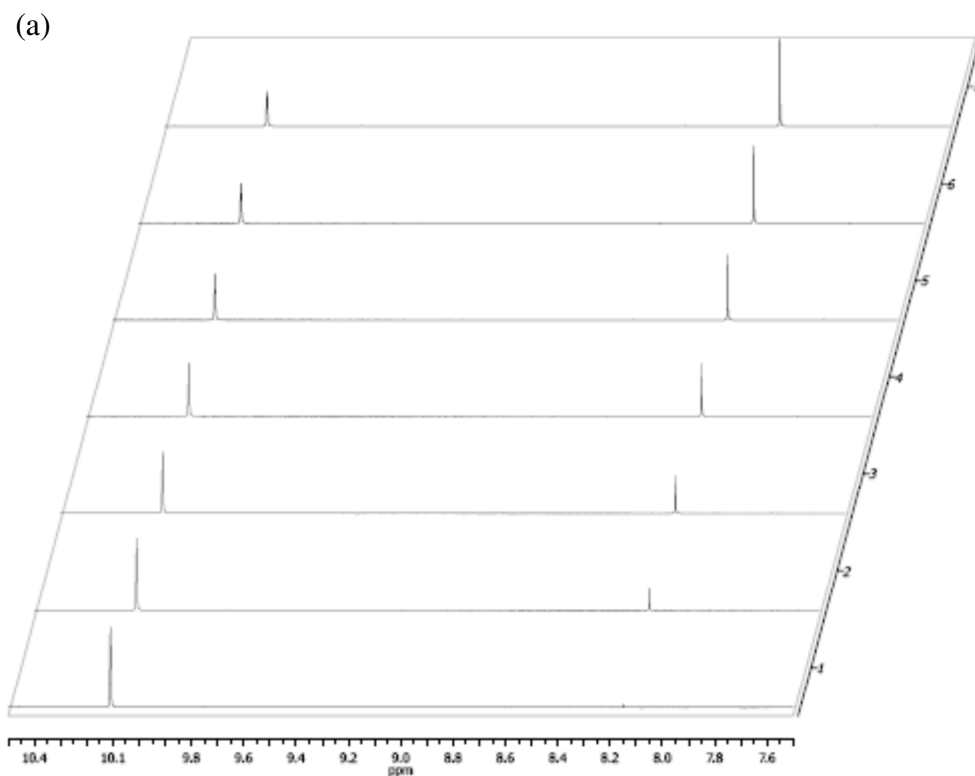

(b)

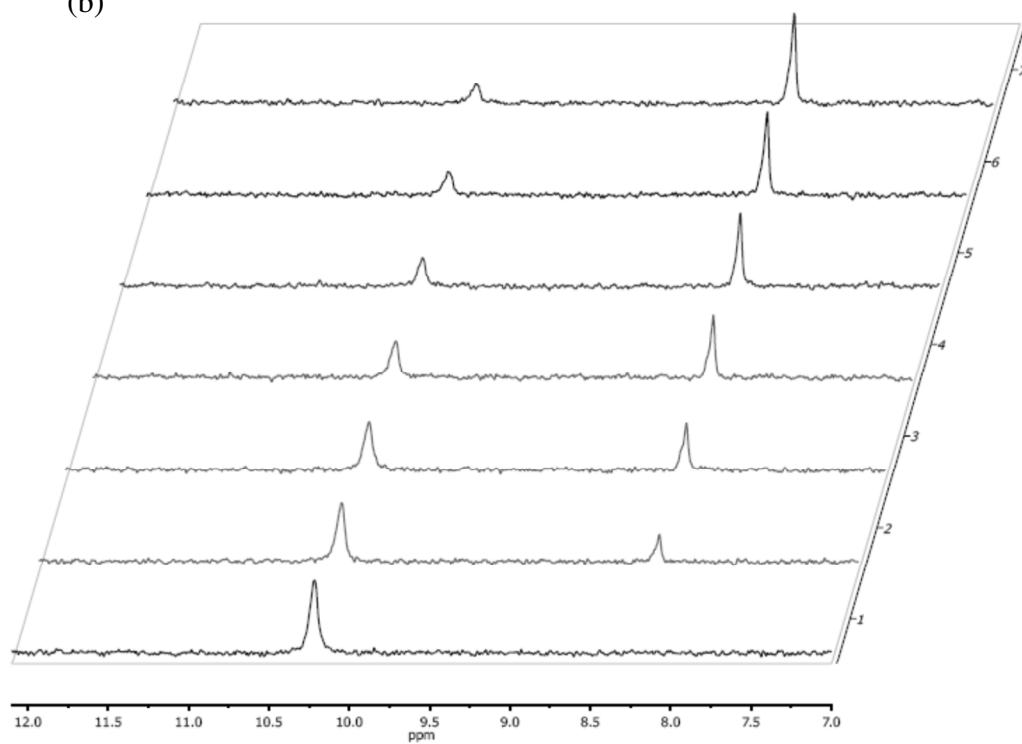



**Figure S4.**  $^{18}\text{O}$ -Exchange (PIX) NMR spectra. (a) Butyrylcholinesterase-catalyzed hydrolysis of FTC in 100 mM MES in 90%  $^{18}\text{O}$  water. (b) Acid-catalyzed hydrolysis – 200 mM HCl in 93%  $^{18}\text{O}$  water. (c) Acid-catalyzed hydrolysis – 50 mM HCl in 93%  $^{18}\text{O}$  water. (d) Base-catalyzed hydrolysis of FTC – 50 mM KOH in 93%  $^{18}\text{O}$  water.

a.

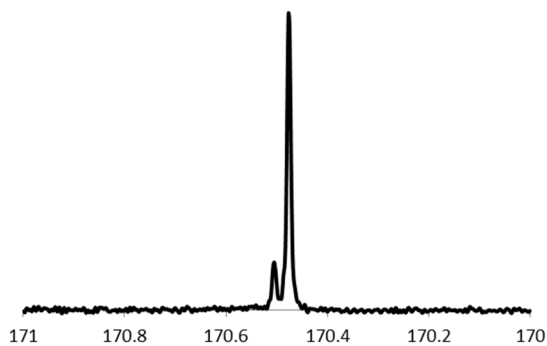

b.

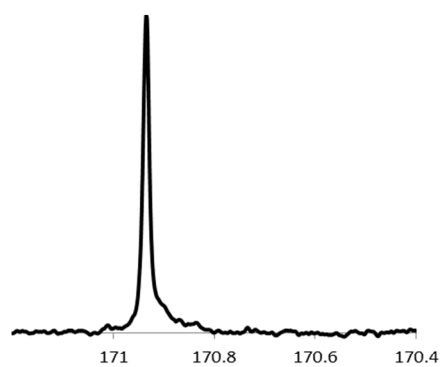

c.

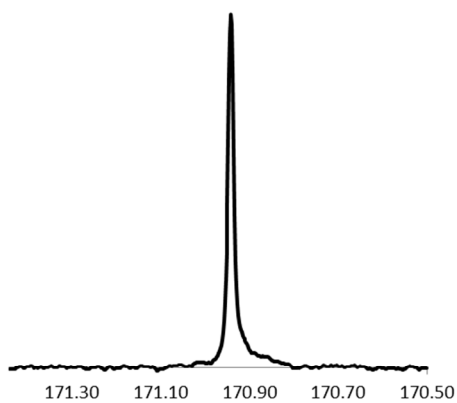

d.

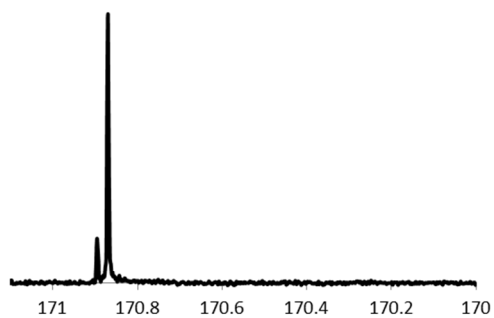

**Table S1.** Observed First-Order Rate Constants for H-FTC and D-FTC Hydrolysis in Acidic, Basic and Neutral Conditions at  $\mu = 200$  mM and 25°C.<sup>a</sup>

|      | Condition                   | $k_{\text{obs}}$ (min <sup>-1</sup> ) |
|------|-----------------------------|---------------------------------------|
| FTC  | 200 mM HCl                  | $0.0052 \pm 0.0001$                   |
|      | 200 mM DCl                  | $0.026 \pm 0.002$                     |
|      | 50 mM HCl/150 mM KCl        | $0.0021 \pm 0.0001$                   |
|      | 50 mM DCl/150 mM KCl        | $0.0026 \pm 0.0002$                   |
|      | H <sub>2</sub> O/200 mM KCl | $0.00135 \pm 0.00007$                 |
|      | D <sub>2</sub> O/200 mM KCl | $0.00032 \pm 0.00001$                 |
| DFTC | 200 mM HCl                  | $0.00646 \pm 0.00008$                 |
|      | 50 mM HCl                   | $0.00273 \pm 0.00001$                 |
|      | H <sub>2</sub> O/200 mM KCl | $0.0018 \pm 0.0001$                   |

<sup>a</sup>These rate constants were used for calculation of the KIEs by the direct method.

**Table S2.** Observed First-Order Rate Constants for FTC Hydrolysis at Various pH Values at  $\mu = 200$  mM and 25°C.<sup>a</sup>

| Conditions                            | pH 1.0 | pH 2.0  | pH 3.0  | pH 4.0  | pH 5.0  | pH 6.0  | pH 7.0 |
|---------------------------------------|--------|---------|---------|---------|---------|---------|--------|
| $k_{\text{obs}}$ (min <sup>-1</sup> ) | 0.0023 | 0.00090 | 0.00088 | 0.00091 | 0.00084 | 0.00095 | 0.0013 |

<sup>a</sup>These rate constant, together with those for FTC in H<sub>2</sub>O from Table 1 (above) were used to generate the log  $k_{\text{obs}}$  v. pH plot in the manuscript.
